# Supplementary material for: Facile thermal exfoliation of Cu sheets towards the CuO/Cu2O heterojunction: a cost-effective photocatalyst with visible-light response for promising sustainable applications
Source: Royal Society of Chemistry journal article supplement (doi:10.1039/c9ra06837f), 2019-01-01
Supplement: c9ra06837f1.pdf [file c9ra06837f1.pdf]

## Electronic Supplementary Information:

# Facile Thermal Exfoliation of Cu Sheets towards CuO/Cu<sub>2</sub>O Heterojunction: A Cost-effective Photocatalyst with Visible-light Response for Promising Sustainable Applications

Yixuan Li<sup>a</sup>, Xi Chen<sup>a, b</sup>, Li Li<sup>a, b, c\*</sup>

<sup>a</sup> College of Chemistry and Chemical Engineering, Qiqihar University, Qiqihar, Heilongjiang 161006, P. R. China.

<sup>b</sup> College of Chemistry and Chemical Engineering, Harbin Institute of Technology, Harbin, Heilongjiang 150090, P. R. China.

<sup>c</sup> College of Materials Science and Engineering, Qiqihar University, Qiqihar, Heilongjiang 161006, P. R. China.

---

\* Corresponding author: Li Li, female, Ph.D., Professor, doctoral tutor, mainly engaged in the preparation and photocatalytic properties of nanocomposites, +86 0452-2738351. E-mail: qqhrll@163.com; qqhrlili@126.com (L.Li).

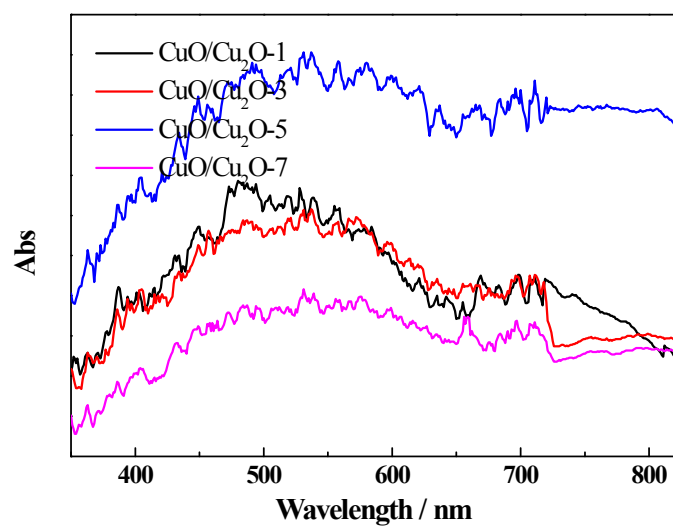

**Fig. S1** UV-Vis DRS spectrum of different CuO/Cu<sub>2</sub>O composites.

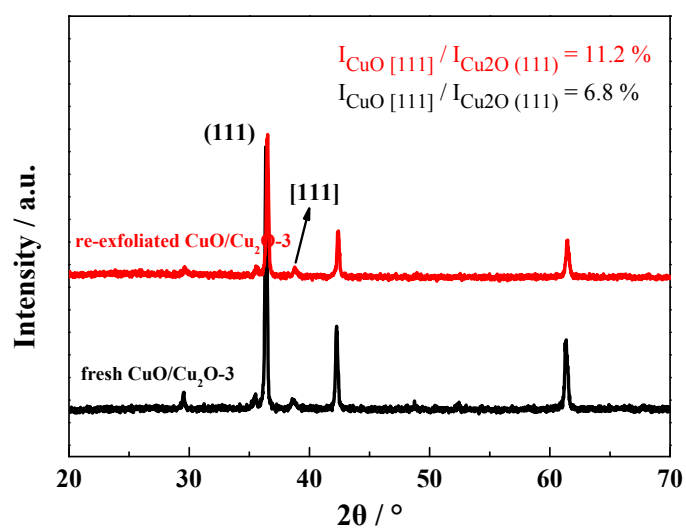

**Fig. S2** XRD patterns of CuO/Cu<sub>2</sub>O-3 before and after photocatalytic removal for cycled thermal exfoliation.

**Tab. S1** Element content analysis of CuO/Cu<sub>2</sub>O-3 composite from XPS spectra (Atomic %)

| Sample                  | C/%   | O/%   | Cu <sup>+</sup> /% | Cu <sup>2+</sup> /% |
|-------------------------|-------|-------|--------------------|---------------------|
| CuO/Cu <sub>2</sub> O-3 | 61.99 | 28.77 | 8.28               | 0.96                |

**Tab. S2** Comparison of different performances of Cu-based photocatalysts for dye degradation

| Catalyst                                   | synthetic method          | Light source                    | Catalyst loading (g) | Dye        | Concentration (mg/L) | Time (min) | Efficiency |
|--------------------------------------------|---------------------------|---------------------------------|----------------------|------------|----------------------|------------|------------|
| CuO                                        | Solid phase <sup>1</sup>  | UV lamp                         | 0.5                  | MB         | 10                   | 210        | 33%        |
| Cu/CuO                                     | Liquid phase <sup>2</sup> | UV lamp                         | 0.02                 | MB         | 10                   | 50         | 15%        |
| Cu/Cu <sub>2</sub> O                       | Solid phase <sup>3</sup>  | Xe lamp (420 nm cut-off)        | 0.28                 | MB         | 20                   | 120        | 67%        |
| Cu@Cu <sub>2</sub> O                       | Liquid phase <sup>4</sup> | UV lamp                         | 0.01                 | MB         | 10                   | 50         | 4.7%       |
| CuO/Cu <sub>2</sub> O                      | Gas phase <sup>5</sup>    | Xe lamp (420 nm cut-off)        | Not detectable       | MB         | 10                   | 240        | 90%        |
| CuO/Cu <sub>2</sub> O                      | Liquid phase <sup>6</sup> | Xe lamp (420 nm cut-off)        | 0.015                | MO         | 6.5                  | 120        | 95%        |
| CuO/Cu <sub>2</sub> O/Cu                   | Liquid phase <sup>7</sup> | Blue LED                        | 0.015                | MB         | 10                   | 90         | 92%        |
| <b>CuO/Cu<sub>2</sub>O<br/>(This work)</b> | <b>Solid phase</b>        | <b>Xe lamp (420 nm cut-off)</b> | <b>0.05</b>          | <b>RhB</b> | <b>20</b>            | <b>120</b> | <b>73%</b> |

**Tab. S3** The energy band gaps ( $E_g$ ), conduction band ( $E_{CB}$ ) and valence band potentials ( $E_{VB}$ ) of CuO and Cu<sub>2</sub>O

| Sample            | $E_g/eV$ | $E_{CB}/eV$ | $E_{VB}/eV$ |
|-------------------|----------|-------------|-------------|
| CuO               | 1.7      | 0.46        | 2.16        |
| Cu <sub>2</sub> O | 2.2      | -0.28       | 1.92        |

\*These values were obtained from the previous representative reports.<sup>8,9</sup>

## References

- (1) R. Saravanan, S. Joicy, V. Gupta, V. Narayanan, A. Stephen, Mater. Sci. Eng. C 2013, **33**, 4725-4731.
- (2) L. Xu, C. Srinivasakannan, J. Peng, L. Zhang, D. Zhang, J. Alloy Compd. 2017, **695**, 263-269.
- (3) W. Chen, Z. Fan, Z. Lai, J. Mater. Chem. A 2013, **1**, 13862-13868.
- (4) L. Xu, C. Srinivasakannan, J. Peng, M. Yan, D. Zhang, L. Zhang, Appl. Surf. Sci. 2015, **331**, 449-454
- (5) N.D. Khiavi,, R. Katal,, S.K. Eshkalak, S.M. Panah, S. Ramakrishna, H.J. Yong, Nanomaterials 2019, **9**, 1011.
- (6) D. Jiang, J. Xue, L. Wu, W. Zhou, Y. Zhang, X. Li, Appl. Catal. B Environ. 2017, **211**, 199-204.
- (7) S. Mosleh, M.R. Rahimi, M. Ghaedi, K. Dashtian, S. Hajati, Ultrasomn. Sonochem. 2018, **40**, 601-610.
- (8) H. Li, Z. Su, S. Hu, Y. Yan, Appl. Catal. B Environ. 2017, **207**, 134-142.
- (9) Y. Xu, M.A.A. Schoonen, Am. Mineral 2000, **85**, 543-556.
